# Supplementary material for: Evaluation of ERA-Interim Air Temperature Data over the Qilian Mountains of China
Source: Hindawi journal article supplement (doi:10.1155/2020/7353482), 2020-04-10
Supplement: f1 [file 7353482.f1.pdf]

## Supplementary Materials

Table S1: Bias of monthly mean temperature (°C) between ERA-Interim and observations at all 24 stations in 1979-2017.

| No | January | February | March | April | May  | June | July | August | September | October | November | December |
|----|---------|----------|-------|-------|------|------|------|--------|-----------|---------|----------|----------|
| 1  | +0.8    | -0.1     | -1.1  | -1.5  | -1.3 | -0.9 | -0.5 | -0.3   | -0.4      | -0.3    | -0.1     | +0.6     |
| 2  | +0.7    | -0.6     | -1.7  | -2.3  | -2.5 | -2.1 | -1.7 | -1.7   | -1.7      | -1.3    | -0.1     | +1.1     |
| 3  | +0.5    | -0.1     | -0.8  | -1.3  | -1.3 | -1.0 | -0.7 | -0.9   | -1.1      | -1.1    | -0.5     | +0.6     |
| 4  | +0.2    | -0.6     | -1.2  | -1.4  | -1.3 | -1.0 | -0.8 | -0.9   | -0.8      | -0.6    | -0.6     | +0.4     |
| 5  | -0.8    | -1.5     | -2.3  | -2.8  | -2.6 | -2.2 | -1.7 | -1.8   | -2.0      | -2.1    | -1.8     | -0.5     |
| 6  | -1.0    | -2.4     | -3.9  | -5.2  | -5.2 | -4.6 | -4.3 | -4.1   | -3.8      | -3.4    | -3.0     | -1.1     |
| 7  | -0.1    | -1.4     | -3.0  | -4.1  | -3.7 | -2.9 | -2.7 | -2.8   | -2.6      | -2.2    | -1.9     | -0.3     |
| 8  | -1.1    | -1.9     | -2.3  | -2.7  | -2.5 | -1.9 | -1.8 | -2.3   | -2.6      | -2.4    | -2.0     | -1.2     |
| 9  | -0.4    | -0.3     | -1.1  | -1.9  | -1.4 | -0.6 | -0.3 | -0.9   | -1.5      | -1.4    | -1.3     | -0.7     |
| 10 | -1.3    | -1.9     | -2.3  | -2.6  | -2.1 | -1.4 | -1.2 | -1.6   | -1.7      | -1.9    | -1.9     | -1.3     |
| 11 | +1.0    | +2.7     | +3.6  | +3.5  | +3.8 | +4.0 | +4.0 | +3.6   | +2.9      | +2.4    | +1.7     | +0.9     |
| 12 | -2.1    | -2.2     | -1.9  | -1.5  | -1.0 | -0.5 | -0.2 | -0.5   | -0.9      | -1.4    | -1.9     | -2.0     |
| 13 | +0.7    | -0.8     | -2.0  | -2.2  | -1.8 | -1.2 | -1.2 | -1.6   | -1.5      | -1.4    | -0.8     | +1.1     |
| 14 | -0.7    | -1.0     | -0.8  | -0.7  | -1.1 | -1.6 | -1.9 | -1.8   | -1.4      | -1.0    | -0.3     | -0.4     |
| 15 | -1.9    | -3.2     | -3.5  | -3.6  | -5.1 | -5.6 | -5.8 | -5.7   | -5.4      | -3.4    | -2.0     | -1.2     |
| 16 | -0.3    | -1.1     | -1.1  | -1.5  | -2.5 | -2.6 | -2.6 | -2.5   | -2.9      | -1.4    | 0.0      | +0.5     |
| 17 | -2.1    | -2.8     | -2.8  | -4.2  | -4.4 | -4.1 | -3.8 | -3.7   | -4.2      | -3.7    | -2.5     | -1.4     |
| 18 | -1.2    | -1.6     | -1.3  | -1.0  | -1.2 | -1.4 | -1.5 | -1.4   | -1.3      | -1.2    | -1.1     | -1.2     |
| 19 | -3.6    | -3.8     | -3.8  | -3.7  | -3.5 | -3.3 | -2.9 | -2.8   | -2.8      | -3.1    | -3.7     | -3.5     |
| 20 | -2.9    | -2.7     | -2.2  | -2.3  | -2.8 | -2.7 | -2.6 | -2.5   | -2.5      | -2.0    | -2.1     | -3.2     |
| 21 | -1.9    | -3.0     | -2.6  | -3.3  | -3.3 | -3.0 | -2.5 | -2.7   | -3.3      | -3.0    | -1.4     | -0.9     |
| 22 | -1.2    | -2.0     | -3.3  | -4.2  | -3.8 | -3.4 | -3.3 | -3.4   | -3.2      | -3.1    | -3.0     | -1.4     |
| 23 | -2.3    | -2.7     | -3.5  | -4.3  | -3.9 | -3.2 | -3.0 | -3.2   | -3.4      | -3.4    | -2.9     | -2.3     |
| 24 | -1.7    | -2.8     | -3.9  | -4.1  | -3.4 | -3.0 | -3.0 | -3.1   | -3.2      | -3.3    | -3.2     | -1.6     |

Table S2: Comparison of ERA-Interim annual mean temperature with observations at all 24 stations in 1979-2017.

| No | r     | Bias (°C) | RMSE (°C) |
|----|-------|-----------|-----------|
| 1  | 0.987 | -0.4      | ±0.4      |
| 2  | 0.979 | -1.2      | ±1.2      |
| 3  | 0.971 | -0.7      | ±0.7      |
| 4  | 0.970 | -0.7      | ±0.7      |
| 5  | 0.947 | -1.8      | ±1.8      |
| 6  | 0.914 | -3.5      | ±3.5      |
| 7  | 0.905 | -2.3      | ±2.3      |
| 8  | 0.931 | -2.1      | ±2.1      |
| 9  | 0.910 | -1.0      | ±1.0      |
| 10 | 0.904 | -1.8      | ±1.8      |
| 11 | 0.930 | +2.8      | ±2.8      |
| 12 | 0.910 | -1.3      | ±1.4      |
| 13 | 0.959 | -1.0      | ±1.1      |
| 14 | 0.943 | -1.1      | ±1.1      |
| 15 | 0.947 | -3.9      | ±3.9      |
| 16 | 0.898 | -1.5      | ±1.5      |
| 17 | 0.882 | -3.3      | ±3.3      |
| 18 | 0.951 | -1.3      | ±1.3      |
| 19 | 0.950 | -3.4      | ±3.4      |
| 20 | 0.887 | -2.5      | ±2.6      |
| 21 | 0.834 | -2.6      | ±2.6      |
| 22 | 0.936 | -2.9      | ±2.9      |
| 23 | 0.385 | -3.2      | ±3.2      |
| 24 | 0.926 | -3.0      | ±3.0      |

Table S3: Annual averaged  $r$ , Bias and RMSE for different elevation groups in 1979-2017.

|           | $r$   | Bias (°C) | RMSE (°C) |
|-----------|-------|-----------|-----------|
| 1000-1500 | 0.959 | -1.5      | $\pm 1.5$ |
| 1500-2000 | 0.924 | -1.9      | $\pm 1.9$ |
| 2000-2500 | 0.672 | -2.1      | $\pm 2.2$ |
| 2500-3000 | 0.912 | -2.3      | $\pm 2.3$ |
| 3000-3500 | 0.915 | -1.3      | $\pm 2.7$ |
